# Supplementary material
Source: PubMed Central journal article supplement (PMC6268132)
Supplement: molecules-17-09971-s001.pdf [file molecules-17-09971-s001.pdf]

## Supplementary Materials

### BCL::EMAS — Enantioselective Molecular Asymmetry Descriptor for 3D-QSAR

Gregory Sliwoski, Edward W. Lowe, Jr., Mariusz Butkiewicz and Jens Meiler \*

Department of Chemistry, Pharmacology, and Biomedical Informatics, Center for Structural Biology, Institute of Chemical Biology, Vanderbilt University, Nashville, TN 37232-6600, USA

\* Author to whom correspondence should be addressed; E-Mail: jens.meiler@vanderbilt.edu; Tel.: +1-615-936-5662; Fax: +1-615-936-2211.

#### Normalization of Stereochemistry Score

The stereochemistry score is normalized based on the maximum possible stereochemistry score which can be computed assuming  $a \geq b \geq c$  and  $c = a - b$ :

$$\begin{aligned} f(a, b, c) &= -(a - b)(b - c)(c - a) \\ &= -a^3 \left(1 - \frac{b}{a}\right) \left(\frac{b}{a} - \frac{c}{a}\right) \left(\frac{c}{a} - 1\right) \\ &= a^3 \left(1 - \frac{b}{a}\right) \left(2\frac{b}{a} - 1\right) \left(\frac{b}{a}\right) \end{aligned}$$

with  $a^3$  being a constant and  $x := \frac{b}{a}$  we find:  $f(x) = 3x^2 - x - 2x^3$ .

$$\frac{\partial f}{\partial x} = 6x - 1 - 6x^2$$

$$0 = x^2 - x + \frac{1}{6}$$

$$x = \frac{1 \mp \sqrt{\frac{2}{6}}}{2} \rightarrow x = \frac{1}{2} \mp \sqrt{\frac{1}{12}}$$

$$b = 0.211328, c = 0.788675$$

$$\max\{(1 - b)(b - c)(c - 1)\} =$$

**Table S1.** Complete feature set used in feature selection analysis. Control set included all of the same features without novel EMAS functions.

|                           | <b>Descriptor Name</b>                                                                         | <b>Description</b>                                                                                     |                                                                                             |
|---------------------------|------------------------------------------------------------------------------------------------|--------------------------------------------------------------------------------------------------------|---------------------------------------------------------------------------------------------|
| <b>Scalar descriptors</b> | Weight                                                                                         | Molecular weight of compound                                                                           |                                                                                             |
|                           | HbondDonor                                                                                     | Number of hydrogen bonding acceptors derived from the sum of nitrogen and oxygen atoms in the molecule |                                                                                             |
|                           | HBondAcceptor                                                                                  | Number of hydrogen bonding donors derived from the sum of N–H and O–H groups in the molecule           |                                                                                             |
|                           | TopologicalPolarSurfaceArea                                                                    | Topological polar surface area in [ $\text{\AA}^2$ ] of the molecule derived from polar 2D fragments   |                                                                                             |
|                           | LogP                                                                                           | Octanol/water Partition coefficient calculated by atom-additive method                                 |                                                                                             |
| <b>Vector descriptors</b> | TotalCharge                                                                                    | Sum of atomic formal charges across molecule                                                           |                                                                                             |
|                           | Identity                                                                                       | weighted by atom identities                                                                            |                                                                                             |
|                           | 2D Autocorrelation<br>(11 descriptors)                                                         | SigmaCharge<br>PiCharge                                                                                | weighted by $\sigma$ atom charges<br>weighted by $\pi$ atom charges                         |
|                           | 3D Autocorrelation<br>(12 descriptors)                                                         | TotalCharge                                                                                            | weighted by sum of $\sigma$ and $\pi$ charges                                               |
|                           | Radial Distribution Function<br>(48 descriptors)                                               | SigmaEN<br>PiEN                                                                                        | weighted by $\sigma$ atom electronegativities<br>weighted by $\pi$ atom electronegativities |
|                           | Novel EMAS Function<br>weighted by sum of<br>properties<br>(24 descriptors)                    | LonePairEN<br>EffectivePolarizability                                                                  | weighted by lone pair electronegativities<br>weighted by effective atom polarizabilities    |
|                           | Novel EMAS Function<br>weighted by product of<br>properties<br>(24 descriptors)                | Vcharge                                                                                                | weighted by partial atomic charges accounting for alternate resonance forms                 |
|                           | <b>Every Vector descriptor available with and without van der Waals surface area weighting</b> |                                                                                                        |                                                                                             |

**Table S2.** Feature selection results with and without EMAS features. Novel EMAS features have been highlighted.

| Control feature selection (without EMAS) |                                               | Novel feature selection (with EMAS) |                                               |
|------------------------------------------|-----------------------------------------------|-------------------------------------|-----------------------------------------------|
| Descriptor Type                          | Weight                                        | Descriptor Type                     | Weight                                        |
| Radial Distribution Function             | AtomIdentity [surface area scaled]            | Radial Distribution Function        | AtomIdentity [surface area scaled]            |
| Radial Distribution Function             | Vcharge                                       | Radial Distribution Function        | Vcharge                                       |
| Radial Distribution Function             | EffectivePolarizability [surface area scaled] | EMAS (product weight)               | AtomIdentity [surface area scaled]            |
| 3D Autocorrelation                       | SigmaCharge                                   | 2D Autocorrelation                  | SigmaEN [surface area scaled]                 |
| Radial Distribution Function             | LonePairEN                                    | Radial Distribution Function        | PiEN [surface area scaled]                    |
| 2D Autocorrelation                       | SigmaEN                                       | Scalar                              | HbondDonor                                    |
| 3D Autocorrelation                       | SigmaEN                                       | EMAS (product weight)               | SigmaEN [surface area scaled]                 |
| 3D Autocorrelation                       | Vcharge [surface area scaled]                 | 2D Autocorrelation                  | EffectivePolarizability [surface area scaled] |
| 2D Autocorrelation                       | Vcharge [surface area scaled]                 | 3D Autocorrelation                  | Vcharge [surface area scaled]                 |
|                                          |                                               | Radial Distribution Function        | PiEN                                          |
|                                          |                                               | 3D Autocorrelation                  | SigmaCharge                                   |
|                                          |                                               | 2D Autocorrelation                  | EffectivePolarizability                       |
|                                          |                                               | EMAS (sum weight)                   | Vcharge [surface area scaled]                 |
|                                          |                                               | EMAS (product weight)               | Vcharge                                       |
|                                          |                                               | EMAS (sum weight)                   | TotalCharge                                   |
|                                          |                                               | Radial Distribution Function        | EffectivePolarizability                       |
|                                          |                                               | EMAS (sum weight)                   | LonePairEN                                    |
|                                          |                                               | EMAS (product weight)               | PiEN [surface area scaled]                    |
|                                          |                                               | 3D Autocorrelation                  | PiEN [surface area scaled]                    |
|                                          |                                               | Radial Distribution Function        | SigmaCharge                                   |
